# Supplementary material
Source: publisher site journal article supplement (http://bdj.pensoft.net//lib/ajax_srv/article_elements_srv.php?action=download_suppl_file&instance_id=3332954)
Supplement: Supplementary file 1 [file article_elements_srv.php]

# Word cloud 1987-2003 periode

1987/01/01-1987/04/01

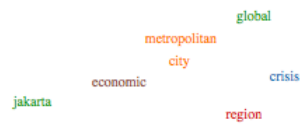

1993/11/25-1994/02/23

1996/11/09-1997/02/07

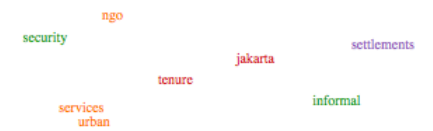

1998/10/30-1999/01/28

2000/10/19-2001/01/17

2003/10/04-2004/01/02



# Word cloud 2010-2015 periode

Translation:

limbah = waste, teluk = bay, pantai = coast, utara = north, domestik = domestic, lingkungan = environment, air = water, kepulauan = islands, Jakarta and Bandung = name of cities, seribu = name of a small archipelago, SAR = specific absorption rate, PAH/SBAS = rain harvesting unit

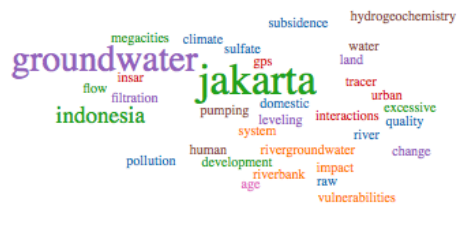

2010/11/26-2011/02/24

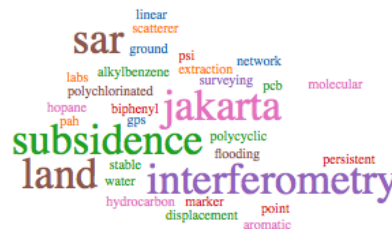

2011/11/21-2012/02/19

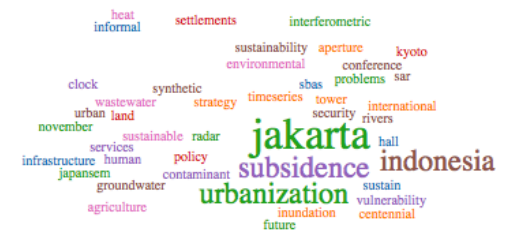

2012/11/15-2013/02/13

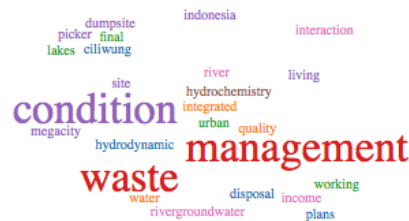

2013/11/10-2014/02/08

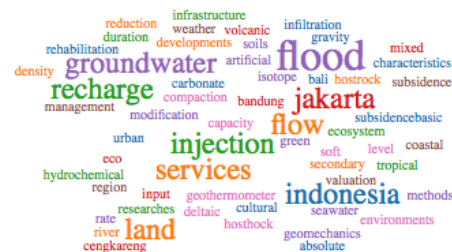

2014/11/05-2015/02/03

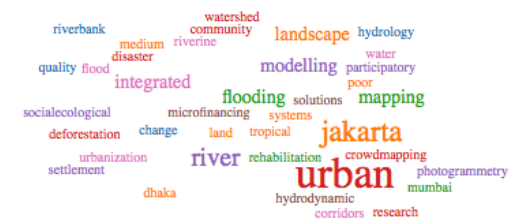

2015/10/31-2016/01/29
